# Supplementary material for: Human monoclonal antibodies targeting carbonic anhydrase IX for the molecular imaging of hypoxic regions in solid tumours
Source: PubMed Central journal article supplement (PMC2736829; doi:10.1038/sj.bjc.6605200), 2009-07-21

**Pimonidazole**

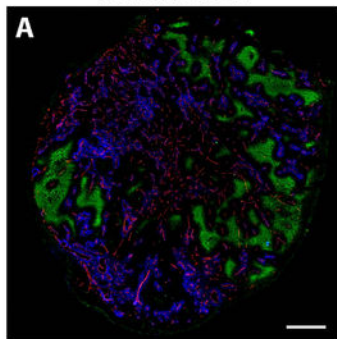

**SIP(CC7) (*in vivo*)**

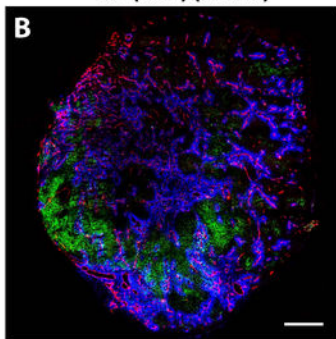

**Anti-CA IX (*ex vivo*)**

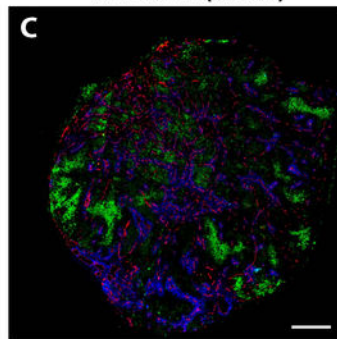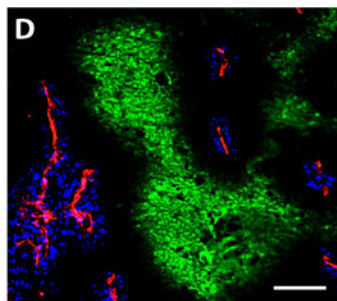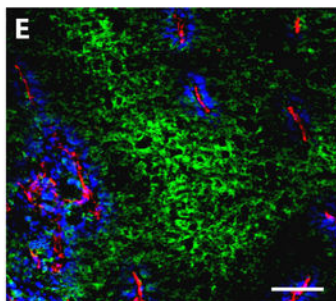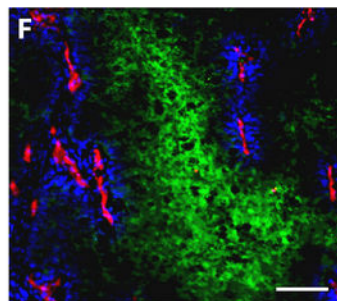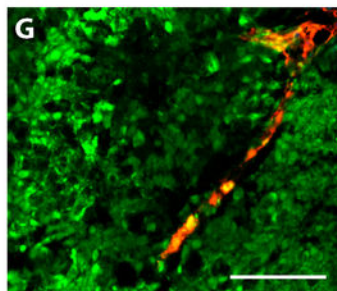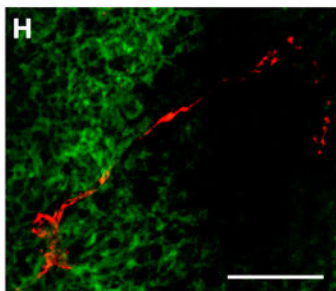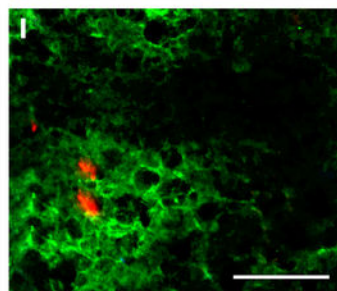

Supplement: 6605200x1.pdf [file 6605200x1.pdf]
